# Supplementary material for: Comparative genomic analysis and characteristics of NCCP15740, the major type of enterotoxigenic Escherichia coli in Korea
Source: Springer Nature journal article supplement (doi:10.1186/s13099-017-0204-y), 2017-09-20

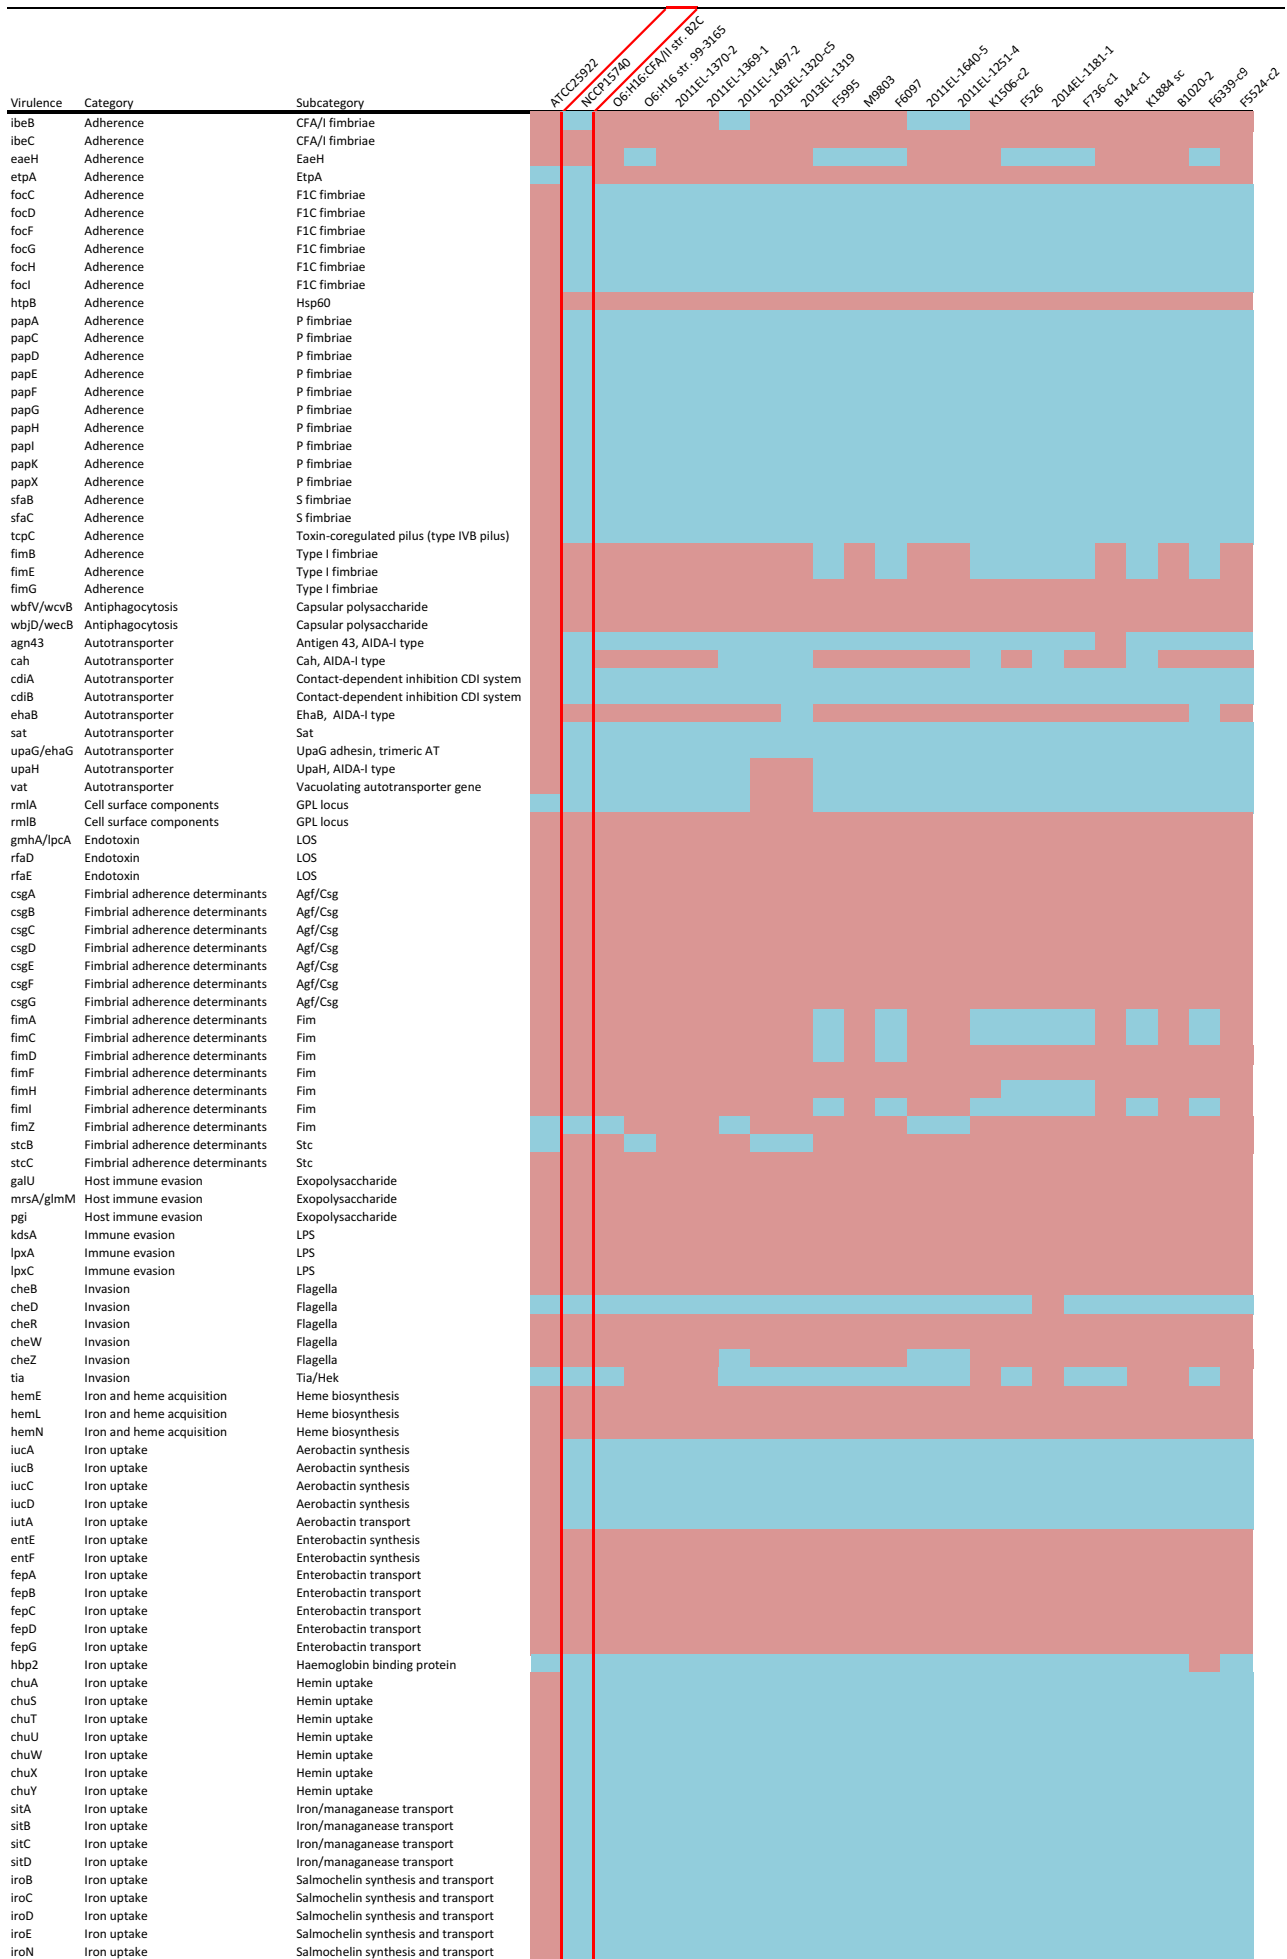

|           |                                    |                                           |
|-----------|------------------------------------|-------------------------------------------|
| psn/fyuA  | Iron uptake                        | Yersiniabactin                            |
| irp1      | Iron uptake                        | Yersiniabactin siderophore                |
| irp2      | Iron uptake                        | Yersiniabactin siderophore                |
| ybtA      | Iron uptake                        | Yersiniabactin siderophore                |
| ybtE      | Iron uptake                        | Yersiniabactin siderophore                |
| ybtP      | Iron uptake                        | Yersiniabactin siderophore                |
| ybtQ      | Iron uptake                        | Yersiniabactin siderophore                |
| ybtS      | Iron uptake                        | Yersiniabactin siderophore                |
| ybtT      | Iron uptake                        | Yersiniabactin siderophore                |
| ybtU      | Iron uptake                        | Yersiniabactin siderophore                |
| ybtX      | Iron uptake                        | Yersiniabactin siderophore                |
| flhF      | Motility and export apparatus      | Flagella                                  |
| flhY      | Motility and export apparatus      | Flagella                                  |
| motA      | Motility and export apparatus      | Flagella                                  |
| motB      | Motility and export apparatus      | Flagella                                  |
| espL1     | Non-LEE encoded TTSS effectors     | EspL1                                     |
| espL4     | Non-LEE encoded TTSS effectors     | EspL4                                     |
| espR1     | Non-LEE encoded TTSS effectors     | EspR1                                     |
| espX1     | Non-LEE encoded TTSS effectors     | EspX1                                     |
| espX4     | Non-LEE encoded TTSS effectors     | EspX4                                     |
| espX5     | Non-LEE encoded TTSS effectors     | EspX5                                     |
| sinH      | Nonfimbrial adherence determinants | SinH                                      |
| tuf       | Other adhesion-related proteins    | EF-Tu                                     |
| msbB2     | Others                             | MsbB2                                     |
| virK      | Others                             | VirK                                      |
| pic       | Protease                           | Pic                                       |
| luxS      | Quorum sensing                     | Autoinducer-2                             |
| rpoS      | Regulation                         | Alternative sigma factor RpoS             |
| csrA      | Regulation                         | Carbon storage regulator A                |
| cheA      | Regulation                         | CheA/CheY                                 |
| cheY      | Regulation                         | CheA/CheY                                 |
| aggR      | Regulator                          | AggR                                      |
| flgA      | Secretion system                   | Flagella (cluster I)                      |
| flgB      | Secretion system                   | Flagella (cluster I)                      |
| flgC      | Secretion system                   | Flagella (cluster I)                      |
| flgD      | Secretion system                   | Flagella (cluster I)                      |
| flgE      | Secretion system                   | Flagella (cluster I)                      |
| flgF      | Secretion system                   | Flagella (cluster I)                      |
| flgG      | Secretion system                   | Flagella (cluster I)                      |
| flgH      | Secretion system                   | Flagella (cluster I)                      |
| flgI      | Secretion system                   | Flagella (cluster I)                      |
| flgJ      | Secretion system                   | Flagella (cluster I)                      |
| flgK      | Secretion system                   | Flagella (cluster I)                      |
| flgL      | Secretion system                   | Flagella (cluster I)                      |
| flgM      | Secretion system                   | Flagella (cluster I)                      |
| flgN      | Secretion system                   | Flagella (cluster I)                      |
| flhA      | Secretion system                   | Flagella (cluster I)                      |
| flhB      | Secretion system                   | Flagella (cluster I)                      |
| flhC      | Secretion system                   | Flagella (cluster I)                      |
| flhD      | Secretion system                   | Flagella (cluster I)                      |
| flhE      | Secretion system                   | Flagella (cluster I)                      |
| fliA      | Secretion system                   | Flagella (cluster I)                      |
| fliD      | Secretion system                   | Flagella (cluster I)                      |
| fliE      | Secretion system                   | Flagella (cluster I)                      |
| fliF      | Secretion system                   | Flagella (cluster I)                      |
| fliG      | Secretion system                   | Flagella (cluster I)                      |
| fliH      | Secretion system                   | Flagella (cluster I)                      |
| fliI      | Secretion system                   | Flagella (cluster I)                      |
| fliJ      | Secretion system                   | Flagella (cluster I)                      |
| fliK      | Secretion system                   | Flagella (cluster I)                      |
| fliL      | Secretion system                   | Flagella (cluster I)                      |
| fliM      | Secretion system                   | Flagella (cluster I)                      |
| fliN      | Secretion system                   | Flagella (cluster I)                      |
| fliO      | Secretion system                   | Flagella (cluster I)                      |
| fliP      | Secretion system                   | Flagella (cluster I)                      |
| fliQ      | Secretion system                   | Flagella (cluster I)                      |
| fliR      | Secretion system                   | Flagella (cluster I)                      |
| fliS      | Secretion system                   | Flagella (cluster I)                      |
| fliT      | Secretion system                   | Flagella (cluster I)                      |
| fliZ      | Secretion system                   | Flagella (cluster I)                      |
| ipaH      | Secretion system                   | Mxi-Spa TTSS effectors controlled by MxiE |
| ipaH2.5   | Secretion system                   | Mxi-Spa TTSS effectors controlled by MxiE |
| gspC      | Secretion system                   | T2SS (Type II secretion system)           |
| gspD      | Secretion system                   | T2SS (Type II secretion system)           |
| gspE      | Secretion system                   | T2SS (Type II secretion system)           |
| gspF      | Secretion system                   | T2SS (Type II secretion system)           |
| gspJ      | Secretion system                   | T2SS (Type II secretion system)           |
| gspK      | Secretion system                   | T2SS (Type II secretion system)           |
| gspL      | Secretion system                   | T2SS (Type II secretion system)           |
| gspM      | Secretion system                   | T2SS (Type II secretion system)           |
| ompA      | Stress adaptation                  | Pore-forming protein                      |
| entA      | Toxin                              | Enterotoxin                               |
| entB      | Toxin                              | Enterotoxin                               |
| entC      | Toxin                              | Enterotoxin                               |
| entD      | Toxin                              | Enterotoxin                               |
| hlyA      | Toxins                             | Alpha-hemolysin                           |
| hlyB      | Toxins                             | Alpha-hemolysin                           |
| hlyC      | Toxins                             | Alpha-hemolysin                           |
| hlyD      | Toxins                             | Alpha-hemolysin                           |
| usp       | Toxins                             | Colicin-like Usp                          |
| eItA      | Toxins                             | Heat-labile enterotoxin                   |
| hlyE/clyA | Toxins                             | Hemolysin/cytolysin A                     |
| phoP      | Two-component system               | PhoPQ                                     |
| phoQ      | Two-component system               | PhoPQ                                     |
| aatA      | Type I secretion system            | ABC transporter for dispersin             |
| aatB      | Type I secretion system            | ABC transporter for dispersin             |
| aatC      | Type I secretion system            | ABC transporter for dispersin             |
| aatD      | Type I secretion system            | ABC transporter for dispersin             |
| aatP      | Type I secretion system            | ABC transporter for dispersin             |
| aec15     | Type VI secretion system           | ACE T6SS                                  |
| aec30     | Type VI secretion system           | ACE T6SS                                  |
| aec31     | Type VI secretion system           | ACE T6SS                                  |
| aec32     | Type VI secretion system           | ACE T6SS                                  |
| aec7      | Type VI secretion system           | ACE T6SS                                  |

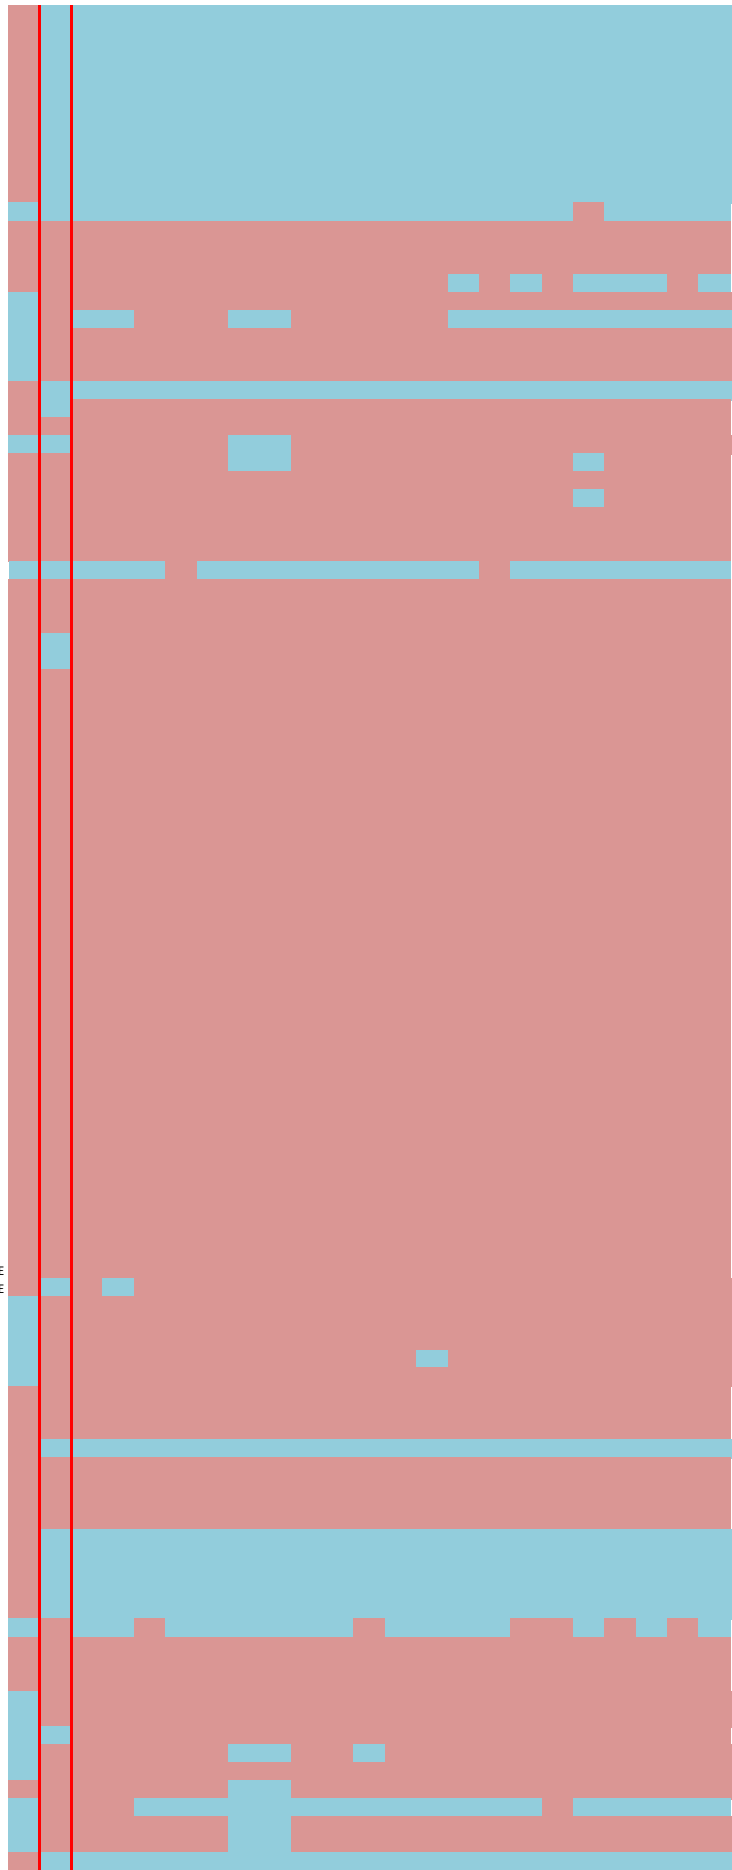

Supplement: MOESM1 [file 15074114]
